# Supplementary material for: Genome sequence of the date palm Phoenix dactylifera L
Source: PubMed Central journal article supplement — Nat Commun. 2013 Aug 6;4:2274. doi: 10.1038/ncomms3274 (PMC3741641; doi:10.1038/ncomms3274), 2013-08-06
Supplement: ncomms3274-s1.pdf [file ncomms3274-s1.pdf]

**Supplementary Information for  
Genome Sequences of the Date Palm *Phoenix dactylifera* L.**

Ibrahim S. Al-Mssallem<sup>1,3,4</sup>, Songnian Hu<sup>1,2,4</sup>, Xiaowei Zhang<sup>1,2,4</sup>, Qiang Lin<sup>1,2,4</sup>, Wanfei Liu<sup>1,2,4</sup>, Jun Tan<sup>1,4</sup>, Xiaoguang Yu<sup>1,2</sup>, Jiucheng Liu<sup>1,2</sup>, Linlin Pan<sup>1,2</sup>, Tongwu Zhang<sup>1,2</sup>, Yuxin Yin<sup>1,2</sup>, Chengqi Xin<sup>1,2,4</sup>, Hao Wu<sup>1,2</sup>, Guangyu Zhang<sup>1,2</sup>, Mohammed M. Ba Abdullah<sup>1</sup>, Dawei Huang<sup>1,2</sup>, Yongjun Fang<sup>1,2</sup>, Yasser O. Alnakhli<sup>1</sup>, Shangang Jia<sup>1,2</sup>, An Yin<sup>1,2</sup>, Eman M. Alhuzimi<sup>1</sup>, Burair A. Alsaihati<sup>1</sup>, Saad A. Al-Owayyed<sup>1</sup>, DuoJun Zhao<sup>1,2</sup>, Sun Zhang<sup>1,2</sup>, Noha A. Al-Otaibi<sup>1</sup>, Gaoyuan Sun<sup>1,2</sup>, Majed A. Majrashi<sup>1</sup>, Fusen Li<sup>1,2</sup>, TALA<sup>1,2</sup>, Jixiang Wang<sup>1,2</sup>, Quanzheng Yun<sup>1,2</sup>, Nafla A. Alnassar<sup>1</sup>, Lei Wang<sup>1,2</sup>, Meng Yang<sup>1,2</sup>, Rasha F. Al-Jelaify<sup>1</sup>, Kan Liu<sup>1,2</sup>, Shenghan Gao<sup>1,2</sup>, Kaifu Chen<sup>1,2</sup>, Samiyah R. Alkhalidi<sup>1</sup>, Guiming Liu<sup>1,2</sup>, Meng Zhang<sup>1,2</sup>, Haiyan Guo<sup>1,2</sup>, and Jun Yu<sup>1,2</sup>

<sup>1</sup>Joint Center for Genomics Research (JCGR), King Abdulaziz City for Science and Technology (KACST) and Chinese Academy of Sciences (CAS), Prince Turki Road, Riyadh 11442, Kingdom of Saudi Arabia.

<sup>2</sup>CAS Key Laboratory of Genome Sciences and Information, Beijing Institute of Genomics, Chinese Academy of Sciences, 1-7 Beichen West Road, Beijing 100101, China.

<sup>3</sup>Department of Biotechnology, College of Agriculture and Food Sciences, King Faisal University, Ahssa 31982, Kingdom of Saudi Arabia.

<sup>4</sup>These authors contributed equally to this work.

Correspondence and requests for materials should be addressed to I.S.M. ([imssallem@kacst.edu.sa](mailto:imssallem@kacst.edu.sa)), J.Y. ([junyu@big.ac.cn](mailto:junyu@big.ac.cn)) or S.N.H. ([husn@big.ac.cn](mailto:husn@big.ac.cn)).

## Supplementary Figures

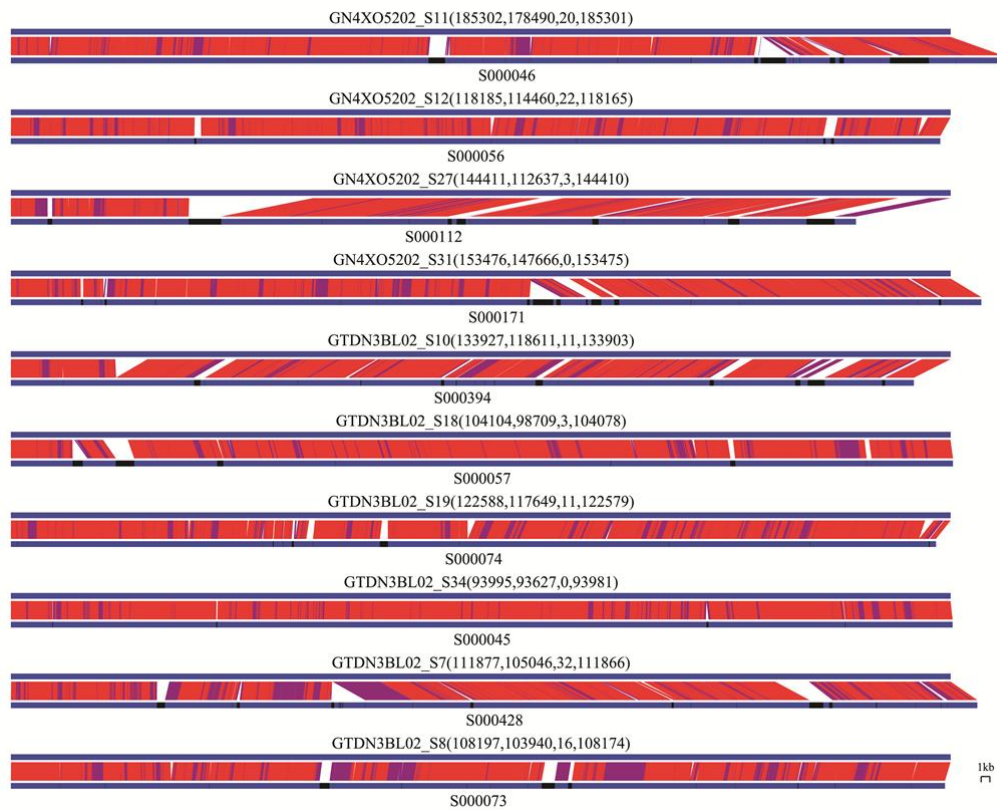

**Supplementary Figure S1. Sequence alignments of 10 BAC sequences (top blue lines) with *P. dactylifera* scaffolds (bottom blue lines).** Unmapped repetitive sequences are often filled with unassembled Ns (black segments) in scaffolds. Repeats are highlighted in purple to differentiate them from the unique matches (red connecting lines).

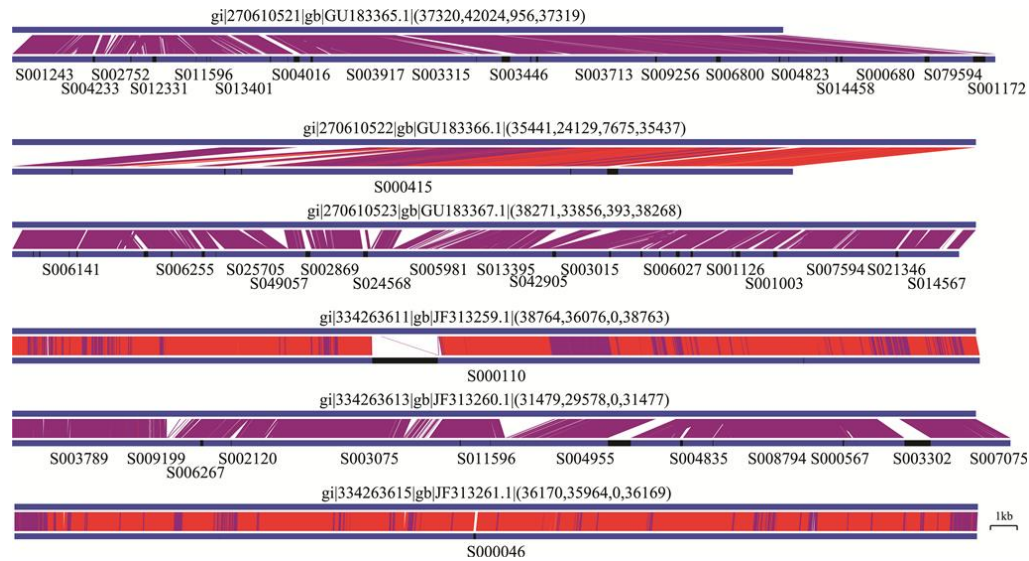

**Supplementary Figure S2. Sequence alignments of 6 fosmid sequences (top blue lines) with *P. dactylifera* scaffolds (bottom blue lines).** Unmapped repetitive sequences are often filled with unassembled Ns (black segments) in scaffolds. Repeats are highlighted in purple to differentiate them from the unique matches (red connecting lines). The fosmid sequences of variety Deglet Noor were downloaded from GenBank (GI number: 334263611, 334263613, 334263615, 270610521-270610523)]

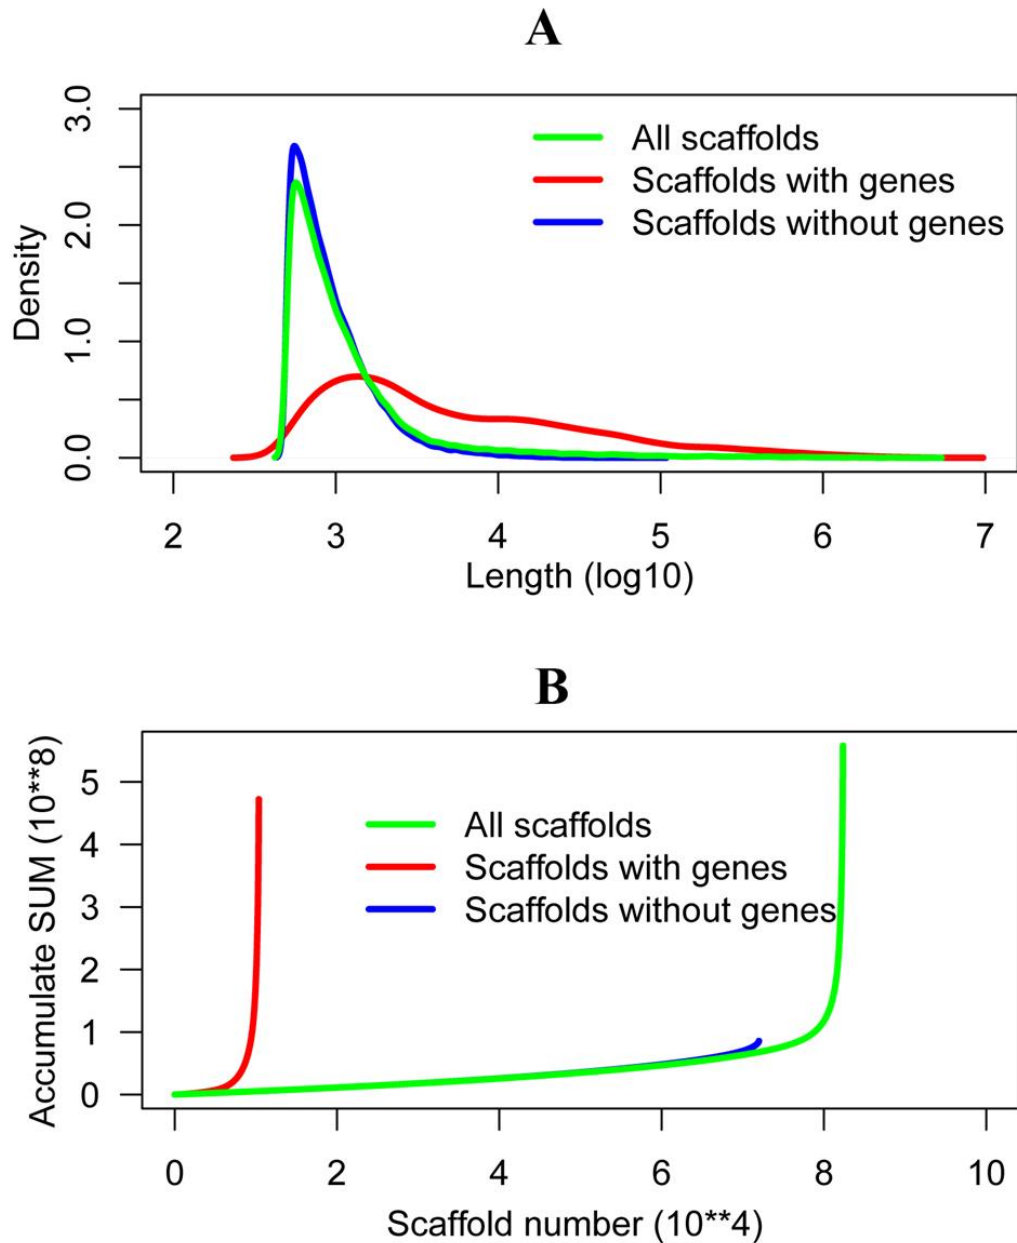

**Supplementary Figure S3. Comparison between scaffolds with genes and without genes in the *P. dactylifera* genome assembly. (A).** Correlation between gene density and scaffold size. **(B).** Correlation between scaffold number and scaffold accumulative size.

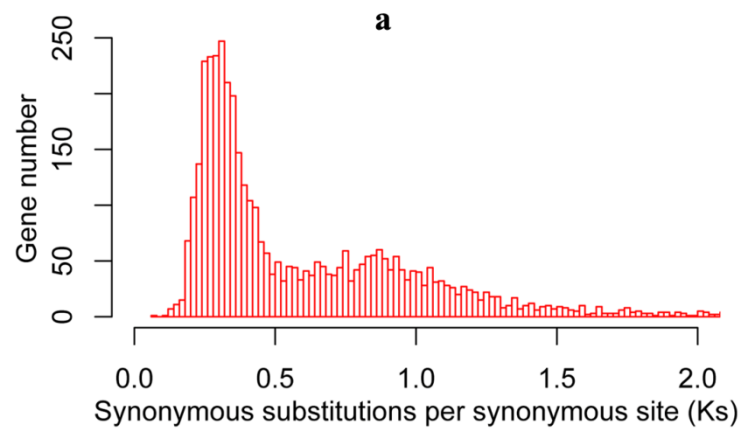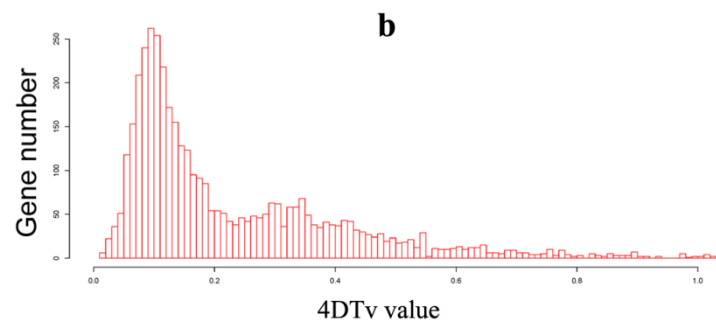

**Supplementary Figure S4. The Ks (a) and 4DTv(b) distribution of gene pairs in the collinear regions of *P. dactylifera* genome assembly.**

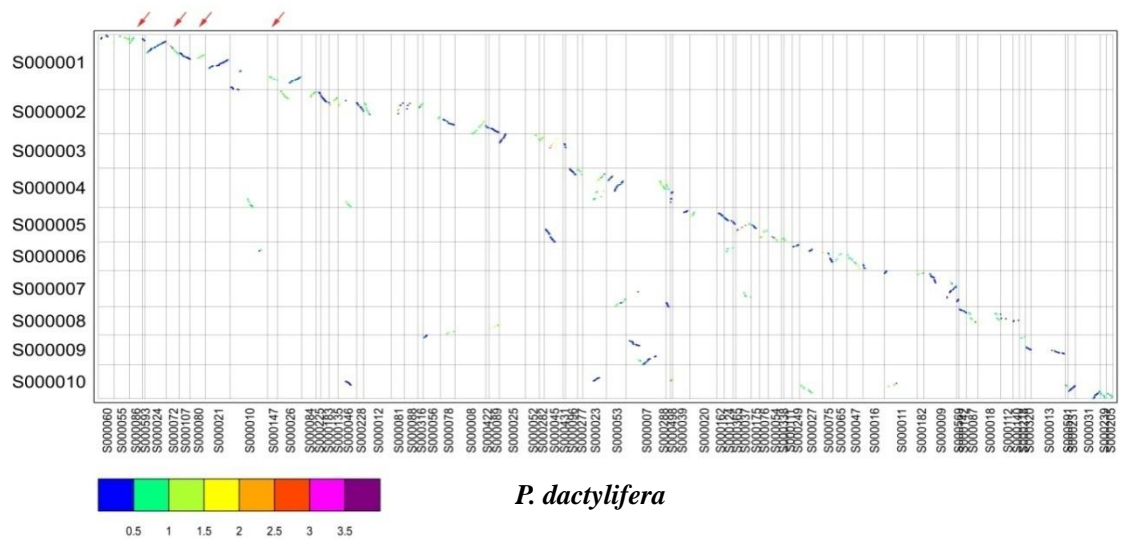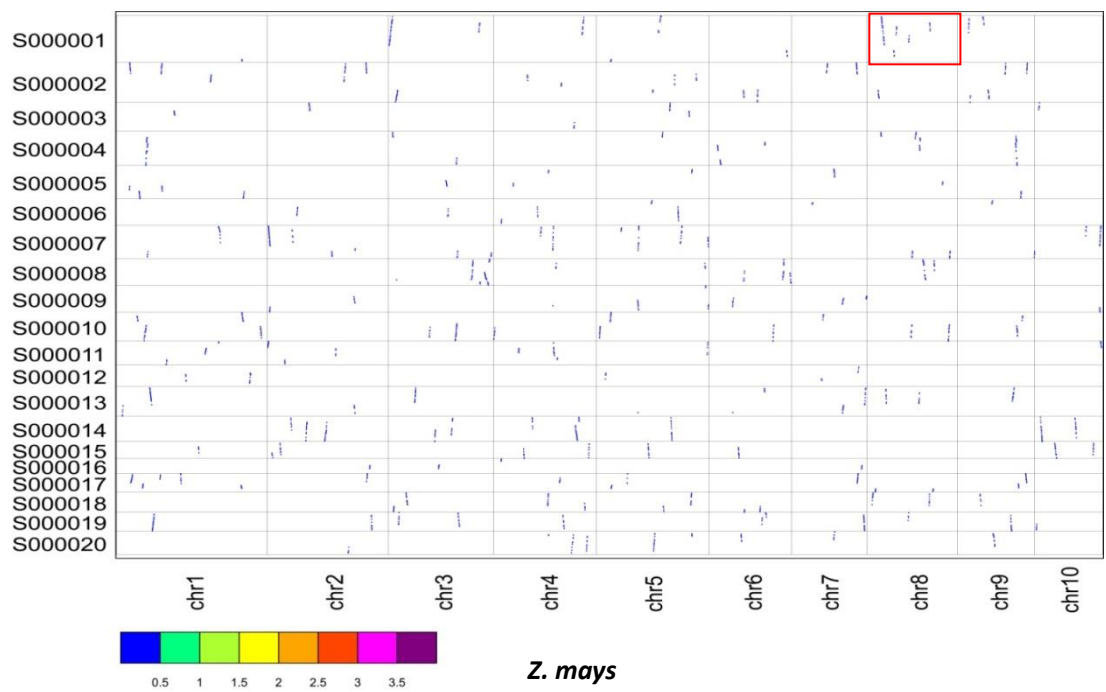

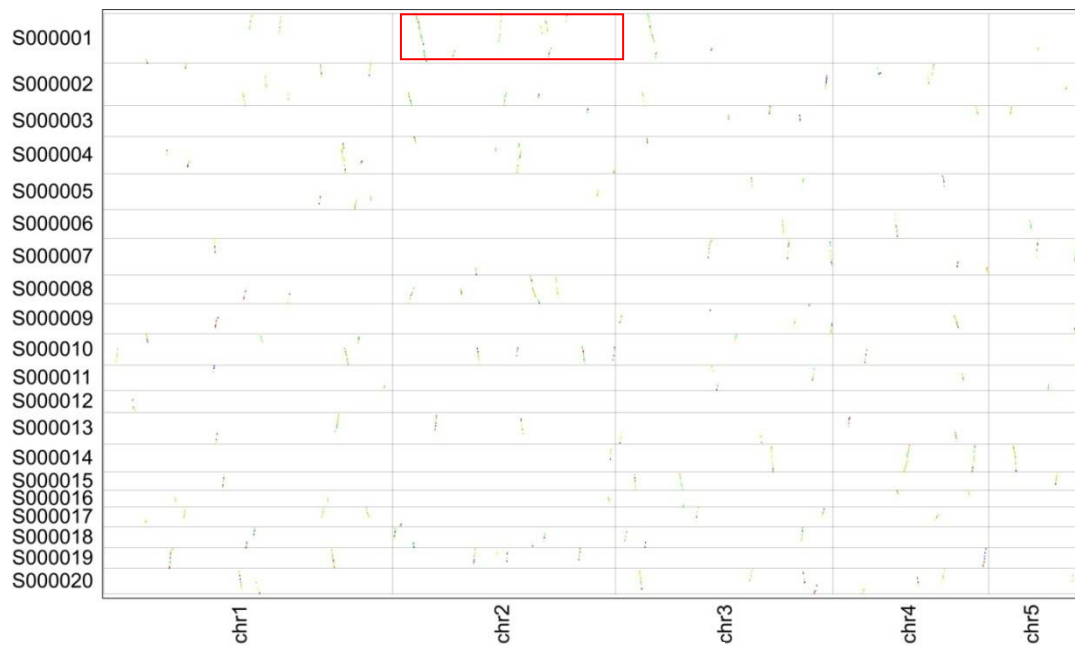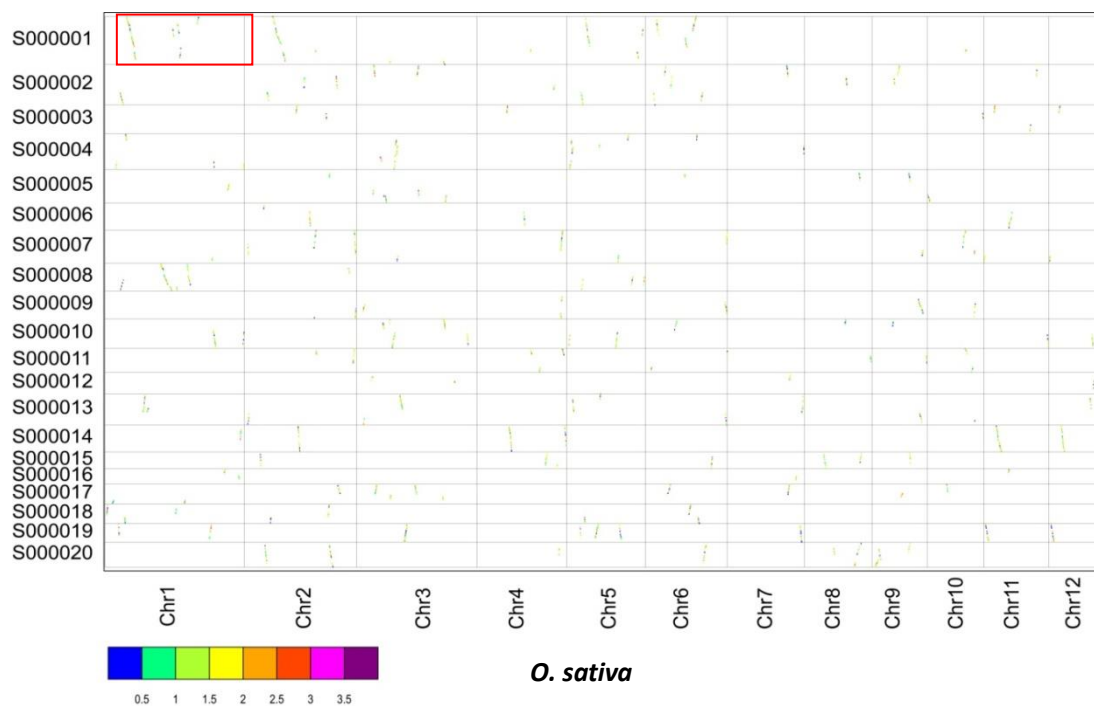

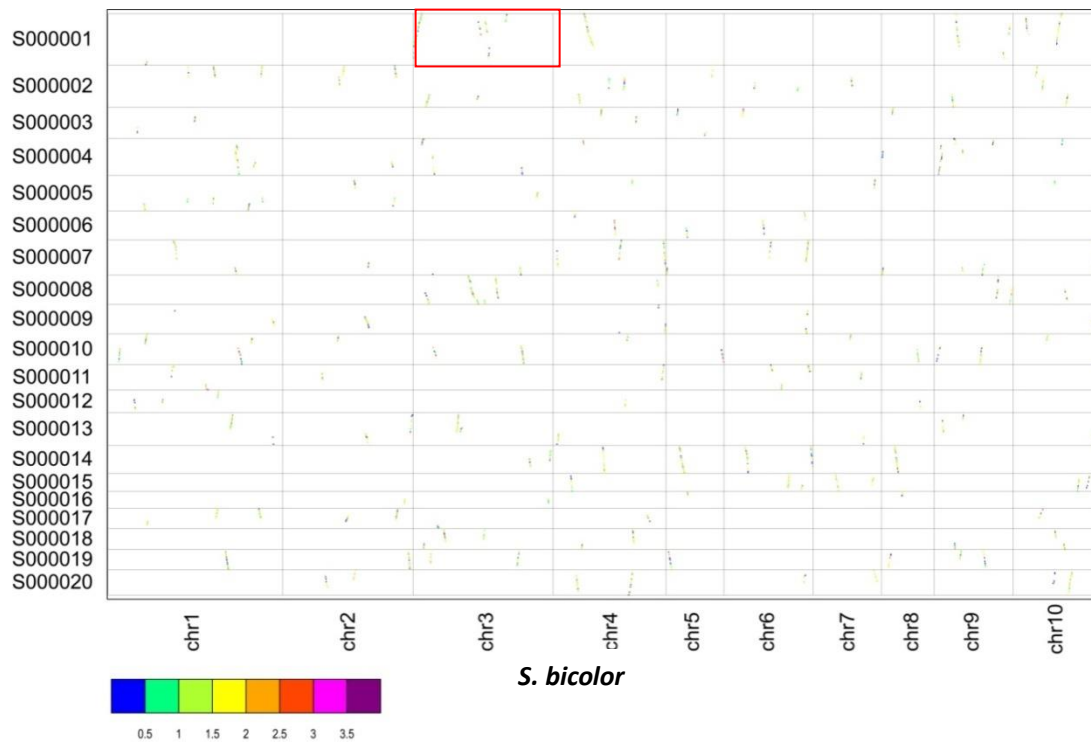

**Supplementary Figure S5. Alignment of 20 largest scaffolds of the *P. dactylifera* assembly with other monocots chromosomes.** The color bar indicates Ks values. The red arrow indicates the syntenies separated from S000001 and maintain the same pattern in other monocots. The red box indicates syntenies between monocot chromosome and the largest scaffolds in the *P. dactylifera* genome assembly.

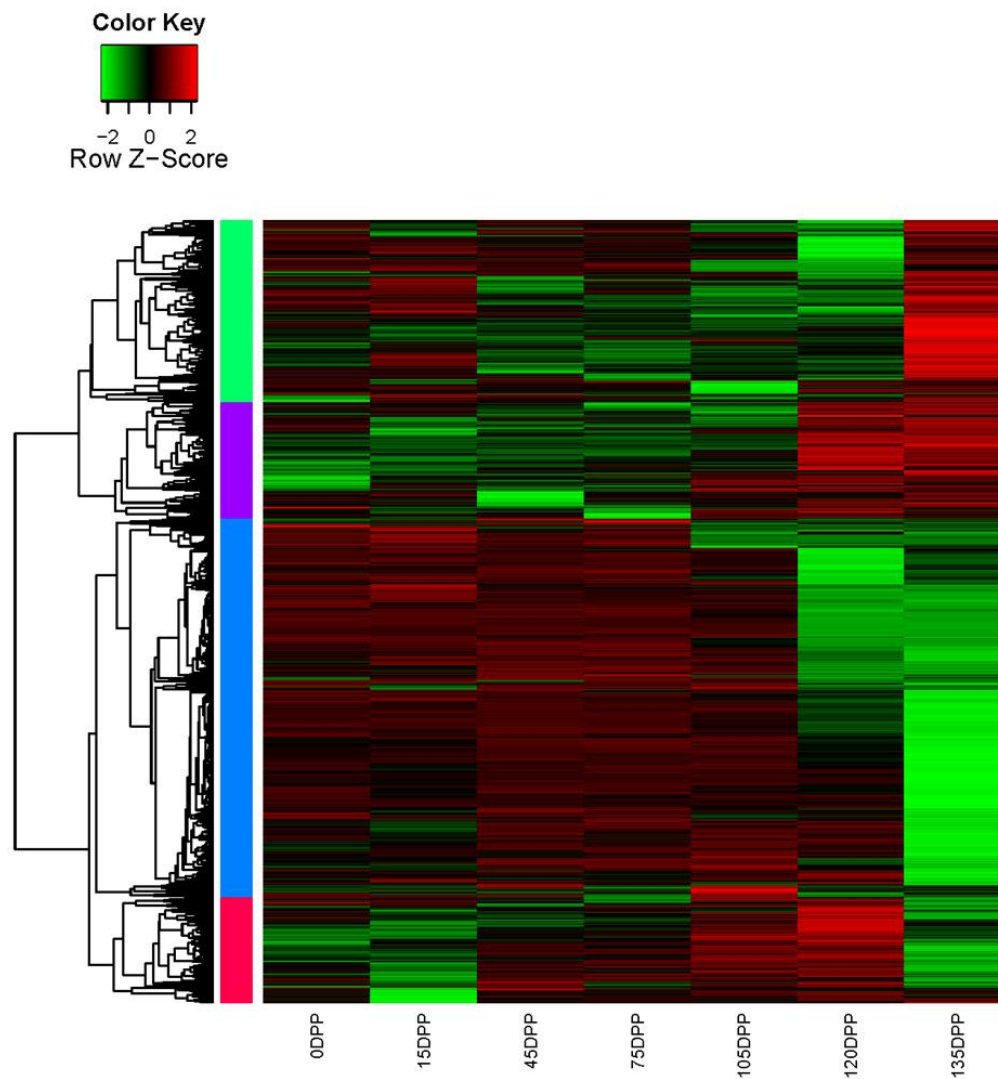

**Supplementary Figure S6. Hierarchical cluster analysis of DEG gene expression based on log ratio RPKM data.** Two-dimensional hierarchical clustering classifies 4,134 differential expression profiles into four expression cluster groups according to the similarity of their expression profiles. Purple bar represents for the up-regulated group; Blue represents for the down-regulated group; Green represents for the irregulated group 1; Red represents for the irregulated group 2.

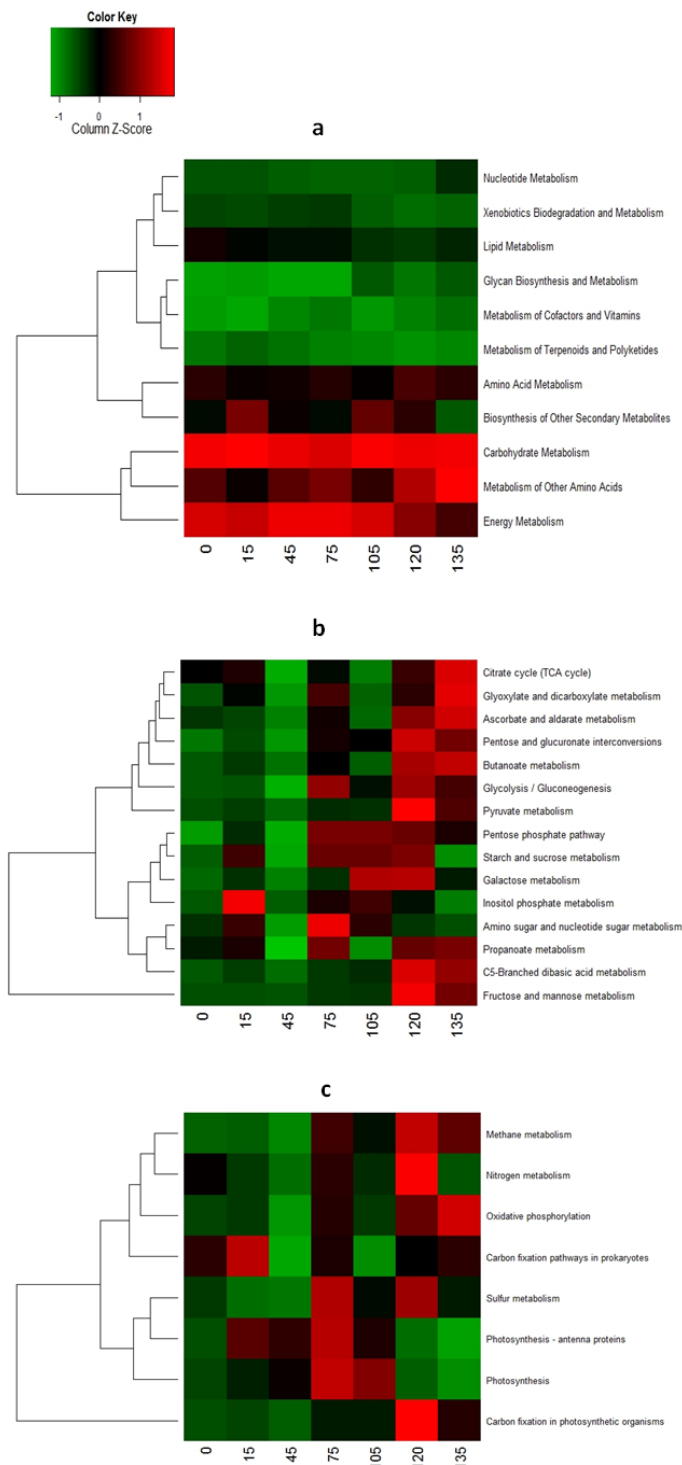

**Supplementary Figure S7. Expression profiles of metabolic pathways.** Important metabolism pathways based on KEGG annotation were selected and clustered based on scaled gene expression level. The date palm fruit samples of 0, 15, 45, 75, 105, 120, and 135 days post pollination were used for the transcriptomic study. We show here: **(a)** KEGG 3<sup>rd</sup> level pathways related to nutrition metabolism, **(b)** Carbon Carbohydrate metabolism pathways, and **(c)** Energy metabolism pathways.



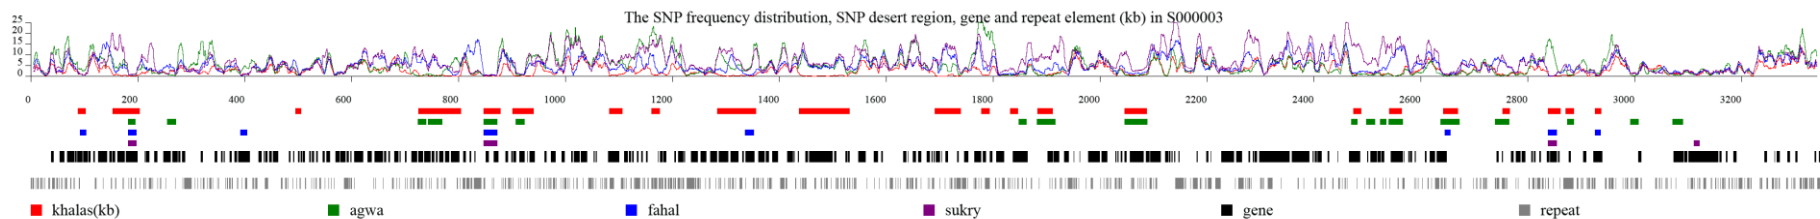

**Supplementary Figure S9. An example of SNP desert regions found in the four *P. dactylifera* varieties.** Horizontal colored bars below the plot of SNP rate indicate SNP desert regions.

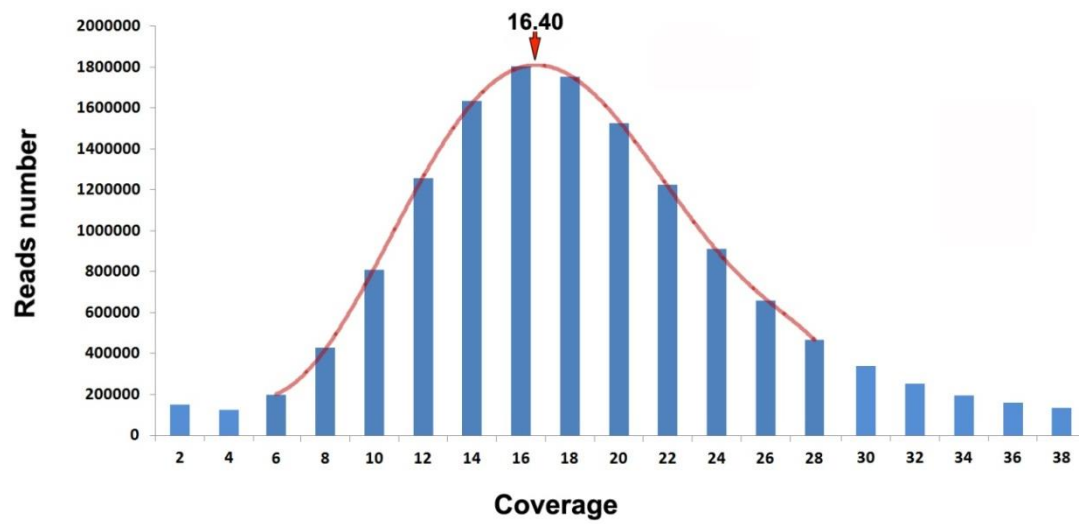

**Supplementary Figure S10. Genome size estimation based on repeat values of Roche/454 sequence reads masked by 20-mers.**

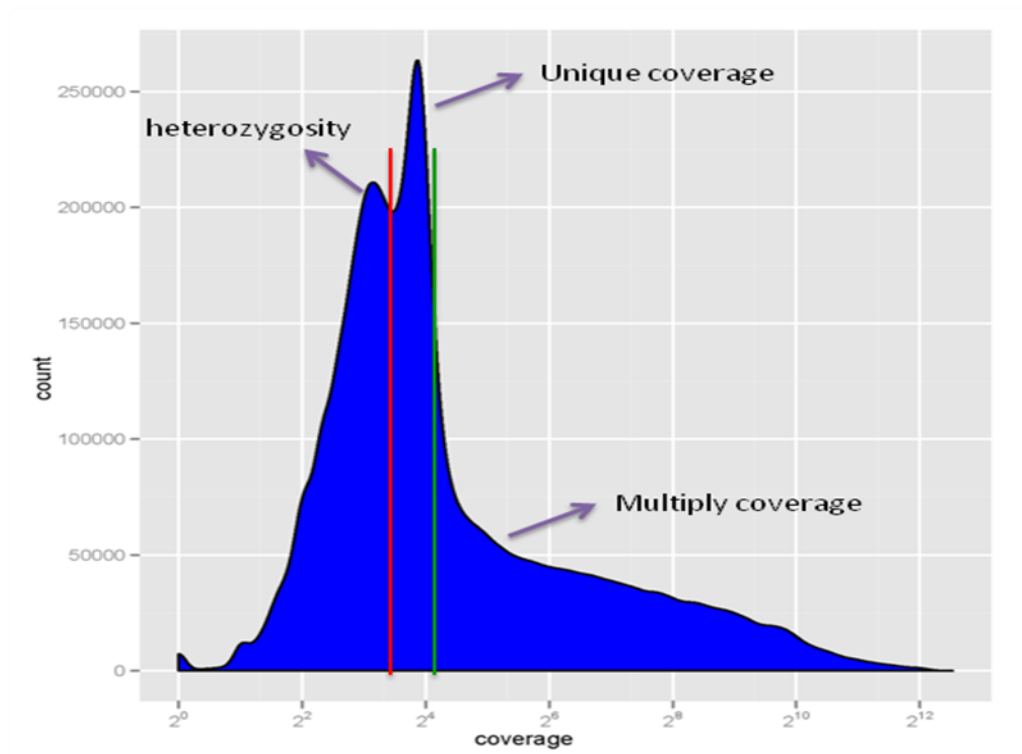

**Supplementary Figure S11. Genome size estimation based on the coverage of Newbler-assembled contigs.**

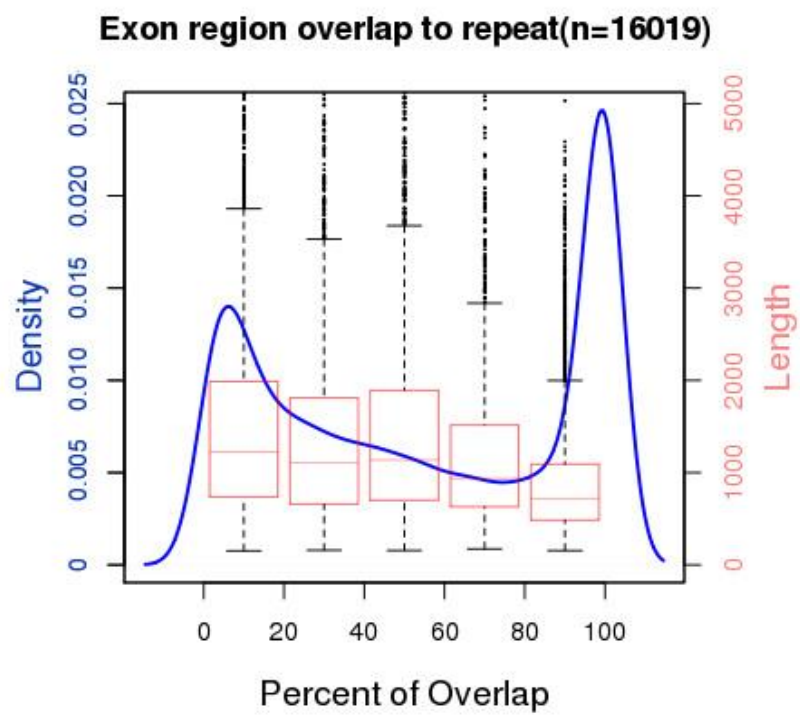

**Supplementary Figure S12. Status of gene models that overlap with repeat annotation.**

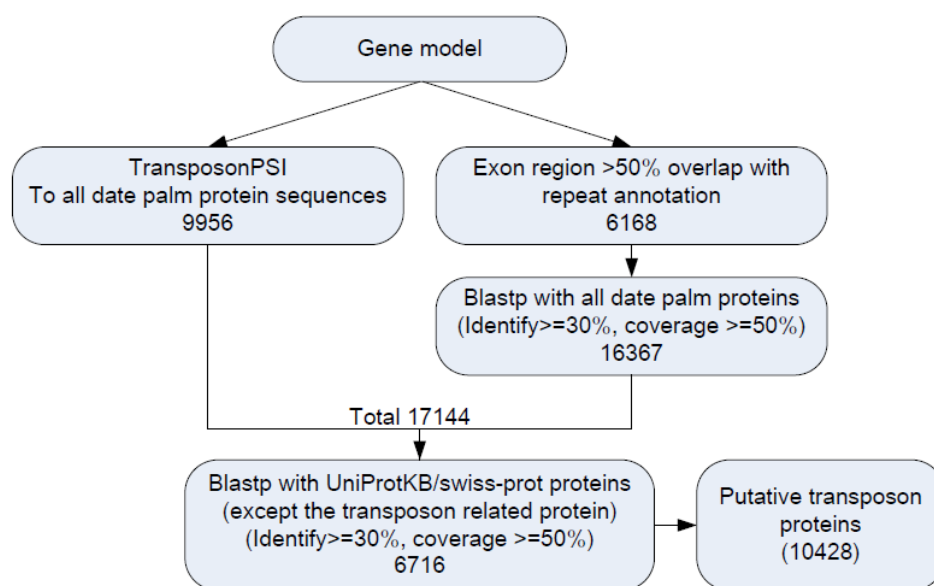

**Supplementary Figure S13. Identification of putative TE-containing proteins.**

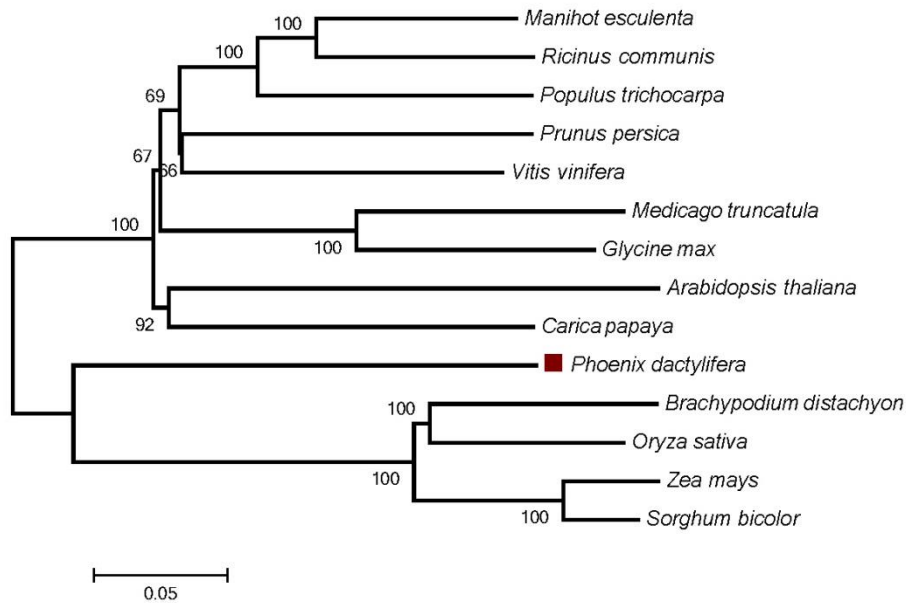

**Supplementary Figure S14. Phylogenetic tree of 13 sequenced plant genomes and *P. dactylifera* genome.** We select the genes with only single copy in each orthology group. Amino acid sequence of genes were concatenated to structure the NJ tree by MEGA5.

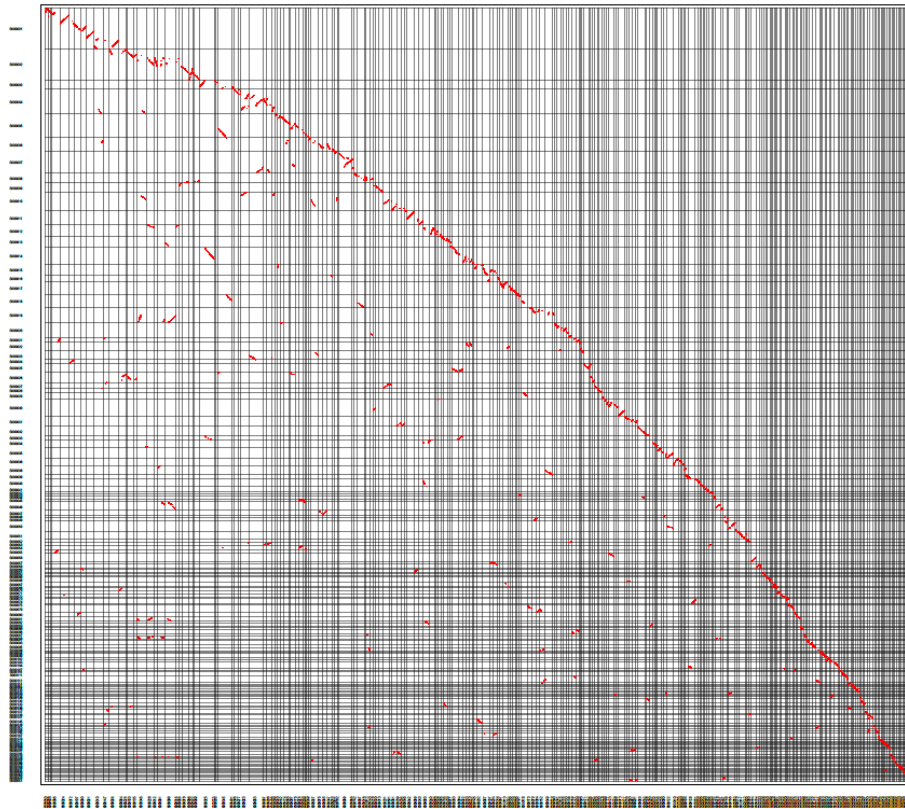

**Supplementary Figure S15. Collinear blocks in *P. dactylifera* genome assembly**

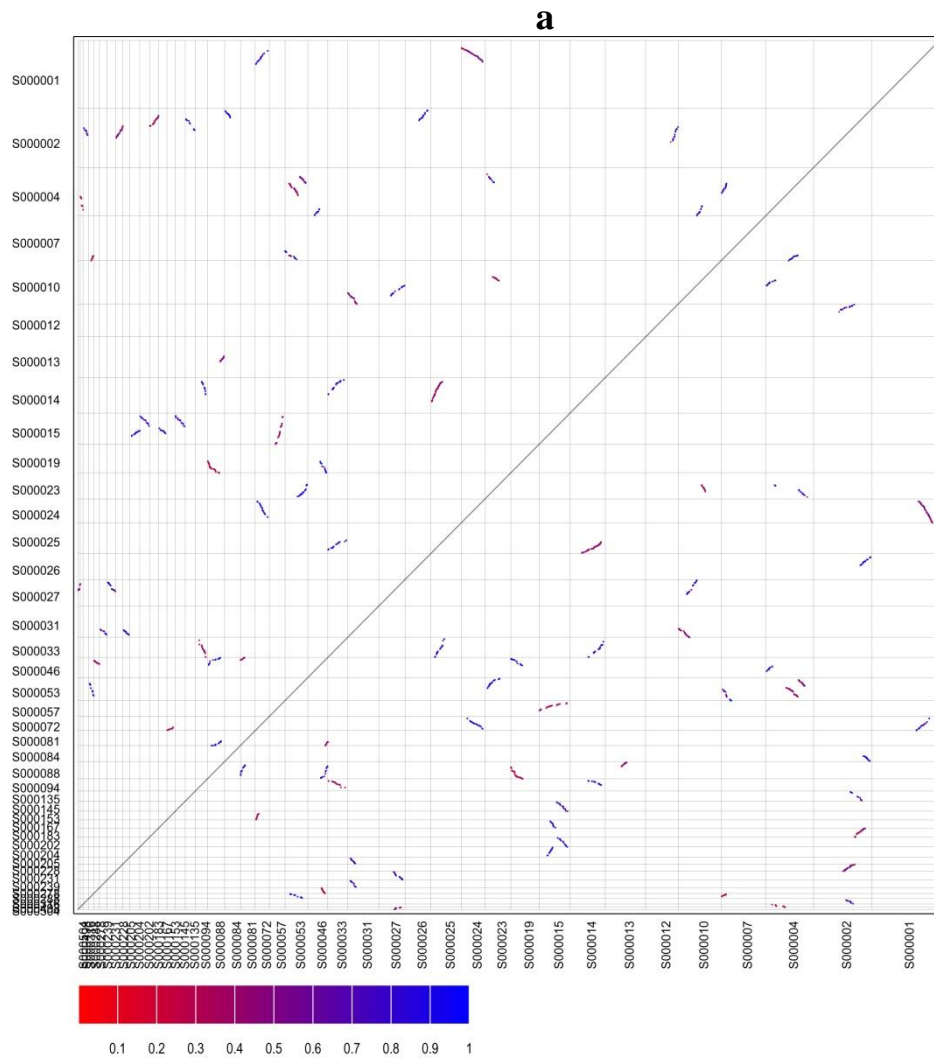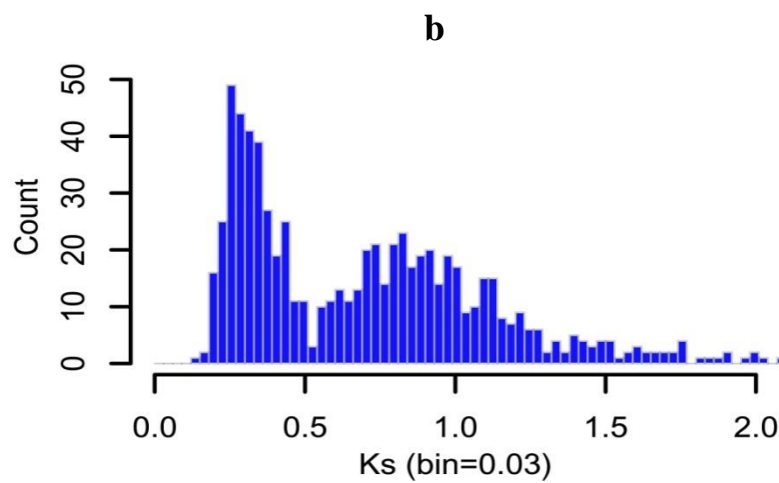

**Supplementary Figure S16. Orthologous relationships (a) and Ks distribution of genes (b) in multi-syntenic regions.** We chose the blocks size with more than 10 gene pairs in this plot. Scaffolds length depends on all its gene numbers.

## Supplementary Tables

**Supplementary Table S1. An overview of sequence data for *P. dactylifera* genome assembly**

| Library Type | Variety | No.of Librariy. | Insert Size (kb) | Sequencing Platform | Sequencing Reads (M)* | Usable Data (Gb)** | Coverage |
|--------------|---------|-----------------|------------------|---------------------|-----------------------|--------------------|----------|
| Fragment     | Khalas  | 4               | 0.5-0.8          | GS FLX              | 31.40                 | 11.60              | 17.3     |
| BAC          | Khalas  | 2               | 100+             | 3730XL              | 0.05                  | NA                 | 3.8***   |
| Mate pair    | Khalas  | 9               | 1-8              | SOLiD 3(4)          | 1,931.98              | 73.94              | 122.1    |
| Mate pair    | Sukry   | 5               | 0.6-6            | SOLiD 4             | 820.02                | 37.14              | 61.4     |
| Mate pair    | Agwa    | 8               | 0.4-6            | SOLiD 4             | 1,168.00              | 53.38              | 88.2     |
| Mate pair    | Fahal   | 9               | 0.4-15           | SOLiD 4             | 1,226.94              | 54.92              | 90.7     |
| RNA-seq      | Khalas  | 7               | 0.3              | SOLiD 4             | 395.67                | 19.78              | NA       |
| cDNA         | Khalas  | 14              | 0.5-0.8          | GS FLX              | 14.44                 | 4.98               | NA       |

Note: \* and \*\* indicate numbers of reads used for the assembly and uniquely mapped data, respectively. \*\*\* Indicates clone coverage, when the insert size of the BAC clones is assumed ~100 kb in average.

**Supplementary Table S2. Genome assembly validation based on BAC and fosmid sequences**

|                                 | <b>BAC</b>         | <b>Fosmid</b>    |
|---------------------------------|--------------------|------------------|
| Number                          | 10                 | 6                |
| Total length (bp)               | 1,276,062          | 217,445          |
| Matched (%)                     | 1,257,235 (98.52%) | 209,809 (96.49%) |
| Unique aligned (%)              | 1,007,504 (78.95%) | 73,759 (33.92%)  |
| Repeat aligned (%)              | 249,731 (19.57%)   | 136,050 (62.57%) |
| Aligned in single scaffolds (%) | 1,190,835 (93.32%) | 110,797 (50.95%) |

**Supplementary Table S3. Genome assembly validation based on EST data.** ESTs which generated from 8 *P. dactylifera* tissues, the Qatar solexa transcriptome data, and GS FLX data generated by CNRS were mapped to our genome assembly, using BLAT with the parameters “alignment identity  $\geq 95\%$ ”, and “alignment coverage  $\geq 90\%$ , coverage  $\geq 50\%$ ”, respectively.

| Dataset                                | Number | Total length (bp) | >90% of sequence covered<br>by one scaffold |         | >50% of sequence<br>covered by one scaffold |         |
|----------------------------------------|--------|-------------------|---------------------------------------------|---------|---------------------------------------------|---------|
|                                        |        |                   | Number                                      | Percent | Number                                      | Percent |
| Roche/454 Date Palm assembled ESTs:    |        |                   |                                             |         |                                             |         |
| >100 bp                                | 67,867 | 102,241,549       | 57,899                                      | 85.3%   | 65,328                                      | 96.3%   |
| >200 bp                                | 67,642 | 102,201,947       | 57,757                                      | 85.4%   | 65,141                                      | 96.3%   |
| >500 bp                                | 62,451 | 100,112,022       | 53,676                                      | 85.9%   | 60,432                                      | 96.8%   |
| >1000 bp                               | 41,824 | 84,967,502        | 35,871                                      | 85.8%   | 40,741                                      | 97.4%   |
| Qatar Solexa Date Palm assembled ESTs: |        |                   |                                             |         |                                             |         |
| >100 bp                                | 28,889 | 30,553,282        | 24,357                                      | 84.3%   | 26,236                                      | 90.8%   |
| >200 bp                                | 28,664 | 30,512,558        | 24,177                                      | 84.3%   | 26,047                                      | 90.9%   |
| >500 bp                                | 22,344 | 28,140,076        | 19,191                                      | 85.9%   | 20,707                                      | 92.7%   |
| >1000 bp                               | 11,730 | 20,391,890        | 10,236                                      | 87.3%   | 11,012                                      | 93.9%   |
| CNRS Date Palm ESTs:                   |        |                   |                                             |         |                                             |         |
| >100 bp                                | 37,048 | 37,848,924        | 28,704                                      | 77.5%   | 35,714                                      | 96.4%   |
| >200 bp                                | 37,048 | 37,845,043        | 28,691                                      | 77.4%   | 35,690                                      | 96.3%   |
| >500 bp                                | 34,615 | 36,790,333        | 26,814                                      | 77.5%   | 33,357                                      | 96.4%   |
| >1000 bp                               | 14,039 | 21,581,452        | 10,874                                      | 77.5%   | 13,545                                      | 96.5%   |

**Supplementary Table S4. General statistics of *P. dactylifera* genome assembly and annotation.**

|                  | Name                     | Parameter                                   |
|------------------|--------------------------|---------------------------------------------|
| Genome           | Genome size (bp)         | 558,022,834                                 |
|                  | Total Contigs(>500 bp)   | 82,354                                      |
|                  | Max Contig Length (bp)   | 4,533,682                                   |
|                  | Genome GC%               | 36.4                                        |
| Coding region    | Gene number              | 41,660                                      |
|                  | Gene Total Length (bp)   | 165,435,063 (29.6%)                         |
|                  | Gene Avg. Length (bp)    | 3,971 (Median: 2,232; Max: 73,150; Min:150) |
|                  | Gene Density             | 1.58/20 kb                                  |
|                  | Gene GC%                 | 39.3                                        |
|                  | CDS Total Length (bp)    | 52,648,171 (9.4%)                           |
|                  | CDS Avg. Length (bp)     | 1,200 (Median: 960; Max: 15,312; Min: 69)   |
|                  | CDS GC%                  | 48.6                                        |
|                  | Exon Total Length (bp)   | 51,580,262 (9.2%)                           |
|                  | Exon Avg. Length (bp)    | 273 (Median: 145)                           |
|                  | Exon per Gene            | 4.6                                         |
|                  | Exon GC%                 | 48                                          |
|                  | Intron Total Length (bp) | 110,854,801 (19.9%)                         |
|                  | Intron Avg. Length (bp)  | 749 (Median: 288)                           |
|                  | Intron GC%               | 35.2                                        |
| Noncoding region | tRNA Number              | 414                                         |
|                  | tRNA total length (bp)   | 31,133                                      |
|                  | rRNA Number              | 677 (5S=219; 45S=458)                       |
|                  | rRNA total length (bp)   | 247,686                                     |
|                  | snoRNA Number            | 62 (H/ACA 44;C/D 18)                        |
|                  | snoRNA length (bp)       | 7,199 (H/ACA 4,008;C/D 3,191)               |

**Supplementary Table S5. Microsatellite annotation of *P. dactylifera* genome**

|                    | n=6-11 |             | n>11  |             |
|--------------------|--------|-------------|-------|-------------|
|                    | % GC   | % genome    | % GC  | % genome    |
| Mononucleotides    | 7.88   | 1.76        | 13.23 | 0.09        |
| Dinucleotids       | 33.25  | 0.14        | 30.23 | 0.11        |
| Trinucleotides     | 35.67  | 0.04        | 13.18 | 0.01        |
| Tetranucleotides   | 21.30  | 0.01        | 27.57 | 0.00        |
| <b>All periods</b> |        | <b>1.94</b> |       | <b>0.21</b> |

**Supplementary Table S6. Repetitive sequences annotation of *P. dactylifera* genome assembly.** We first sequenced 140 randomly selected BACs using Roche/GS FLX platform and generated 8,746 contigs with a total length of 17,631,122 bp (N50 = 10,345 bp). Combining with other reads from capillary sequencing, we assembled repeat consensus using RepeatScout<sup>52</sup>, LTR-finder<sup>53</sup>, and MITE-hunter<sup>54</sup>.

| Class           | Sub-class   | Content (%) <sup>*</sup> |              | Copy number |        |
|-----------------|-------------|--------------------------|--------------|-------------|--------|
|                 |             | in assembly              | in genome    | in genome   | STDEV  |
| retrotransposon | Ty1/Copia   | 5.53                     | 14.03        | 324,380     | 6,032  |
|                 | Ty3/Gypsy   | 1.93                     | 4.17         | 94,881      | 3,692  |
|                 | LINE        | 0.78                     | 0.46         | 12,445      | 314    |
|                 | unknown     | 1.83                     | 3.33         | 76,691      | 1,834  |
| transposon      | hAT/Ac      | 0.14                     | 0.29         | 6,417       | 287    |
|                 | CACTA/EnSpm | 0.03                     | 0.03         | 1,022       | 284    |
| MITEs           |             | 0.3                      | 0.18         | 6,617       | 230    |
| centromere      |             | 0.01                     | 0.01         | 585         | 64     |
| teleomere       |             | 0.02                     | 0.4          | 7,929       | 220    |
| rRNA            | 5S          | 0.01                     | 0.1          | 3,652       | 121    |
|                 | 45S         | 0.02                     | 0.76         | 14,633      | 830    |
| gene families   |             | 0.55                     | 1.26         | 29,373      | 755    |
| unknown         |             |                          |              |             |        |
| repeats         |             | 10.16                    | 13.38        | 512,638     | 18,289 |
| <b>Total</b>    |             | <b>21.31</b>             | <b>38.41</b> |             |        |

<sup>\*</sup> indicates repeat annotation for both assembled scaffolds (in assembly) and GS FLX reads (in genome). STDEV: standard deviation.

**Supplementary Table S7. LTR retrotransposons Ty1/Copia are more than Ty3/Gypsy in the *P. dactylifera* assembly but not in other sequenced plant genomes (% of genome bp).**

| <b>Sequenced plant genome</b>                   | <b>Ty1 (%)</b> | <b>Ty3 (%)</b> | <b>Ty1/Ty3</b> |
|-------------------------------------------------|----------------|----------------|----------------|
| <i>Selaginella moellendorffii</i> <sup>55</sup> | 2.7            | 21.1           | 0.13           |
| <i>Oryza sativa</i> <sup>13,14</sup>            | 2.47           | 12.03          | 0.21           |
| <i>Sorghum bicolor</i> <sup>56</sup>            | 5.18           | 19             | 0.27           |
| <i>Zea mays</i> <sup>57</sup>                   | 21.75          | 37.73          | 0.58           |
| <i>Brachypodium distachyon</i> <sup>58</sup>    | 4.9            | 16.1           | 0.30           |
| <i>Phoenix dactylifera</i> *                    | 10.15          | 4.82           | <b>2.11</b>    |
| <i>Cocos nuncifera</i> * <sup>#</sup>           | 16.53          | 5.33           | <b>3.10</b>    |
| <i>Areca catechu</i> * <sup>#</sup>             | 9.6            | 7.74           | <b>1.24</b>    |
| <i>Arabidopsis thaliana</i> <sup>59</sup>       | 1.4            | 5.2            | 0.27           |
| <i>Malus domestica</i> <sup>60</sup>            | 5.5            | 25.2           | 0.22           |
| <i>Populus trichocarpa</i> <sup>61</sup>        | 1.6            | 4.9            | 0.33           |
| <i>Vitis vinifera</i> <sup>62</sup>             | 4.8            | 14             | 0.34           |
| <i>Glycine max</i> <sup>63</sup>                | 10.7           | 25.3           | 0.42           |
| <i>Ricinus communis</i> <sup>64</sup>           | 4.77           | 11.45          | 0.42           |
| <i>Cajanus cajan</i> <sup>65</sup>              | 6.22           | 11.79          | 0.53           |
| <i>Medicago truncatula</i> <sup>51</sup>        | 4.1            | 5.7            | 0.72           |
| <i>Lotus japonicus</i> <sup>66</sup>            | 7.16           | 8.81           | 0.81           |
| <i>Carica papaya</i> <sup>67</sup>              | 5.5            | 27.8           | 0.20           |
| <i>Fragaria vesca</i> <sup>68</sup>             | 4.58           | 5.99           | 0.76           |
| <i>Brassica rapa</i> <sup>69</sup>              | 2.84           | 3.12           | 0.91           |

\*Based on randomly selected Roche 454 reads scanned with Repbase using RepeatMasker ( <http://repeatmasker.org>), we randomly sampled 2,760,440 sequences (Roche/454 reads) from date palm, 2,722,940 from coconut palm, and 1,239,603 from areca palm, and scanned them for copia and gypsy sequences based on information from Repbase library (Version 15.1)<sup>70</sup>. # indicates the unpublished in-house sequence data.

**Supplementary Table S8. LEA gene family in the *P. dactylifera* and other sequenced genomes**

| Species                              | LEA_1 | LEA_2 | LEA_3 | LEA_4 | LEA_5 | LEA_6 | SMP | Dehydrin | Total | P-value* for LEA2 |
|--------------------------------------|-------|-------|-------|-------|-------|-------|-----|----------|-------|-------------------|
| <i>Phoenix dactylifera</i>           | 3     | 62    | 5     | 3     | 2     | 2     | 4   | 3        | 84    | NA                |
| <i>Brachypodium distachyon</i>       | 5     | 45    | 5     | 7     | 2     | 1     | 6   | 7        | 78    | 0.015             |
| <i>Oryza sativa</i>                  | 4     | 52    | 4     | 4     | 1     | 2     | 6   | 7        | 80    | 0.11              |
| <i>Sorghum bicolor</i>               | 4     | 46    | 7     | 6     | 2     | 1     | 7   | 3        | 76    | 0.036             |
| <i>Zea mays</i>                      | 3     | 60    | 7     | 5     | 2     | 1     | 4   | 5        | 87    | 0.24              |
| <i>Arabidopsis thaliana</i>          | 3     | 40    | 4     | 9     | 2     | 3     | 6   | 7        | 74    | 0.0048            |
| <i>Carica papaya</i>                 | 2     | 19    | 3     | 3     | 2     | 2     | 3   | 3        | 37    | 0.0082            |
| <i>Glycine max</i>                   | 5     | 75    | 8     | 5     | 5     | 2     | 5   | 3        | 108   | 0.25              |
| <i>Medicago truncatula</i>           | 4     | 21    | 3     | 1     | 2     | 3     | 5   | 2        | 41    | 0.0060            |
| <i>Populus trichocarpa</i>           | 3     | 47    | 4     | 8     | 1     | 2     | 2   | 2        | 69    | 0.22              |
| <i>Ricinus communis</i>              | 1     | 27    | 3     | 4     | 2     | 2     | 4   | 4        | 47    | 0.027             |
| <i>Theobroma cacao</i> <sup>71</sup> | 3     | 37    | 3     | 4     | 3     | 0     | 4   | 4        | 58    | 0.10              |
| <i>Vitis vinifera</i>                | 3     | 20    | 1     | 5     | 3     | 0     | 3   | 2        | 37    | 0.016             |
| <i>Selaginella moellendorffii</i>    | 0     | 7     | 0     | 7     | 2     | 0     | 4   | 0        | 20    | 0                 |

\* Comparison between other plants to *Phoenix dactylifera* by Z test.

**Supplementary Table S9. An overview of fruit transcriptomic data**

| Libraries  | Total reads | Mapped reads | Unique mapped reads | Expressed mRNAs |
|------------|-------------|--------------|---------------------|-----------------|
| 0DPP       | 76,515,395  | 53,825,507   | 11,396,571          | 17,464          |
| 15DPP      | 83,950,995  | 59,009,944   | 9,903,023           | 17,570          |
| 45DPP      | 77,132,786  | 53,999,668   | 12,355,849          | 15,920          |
| 75DPP      | 74,369,980  | 55,665,445   | 14,302,703          | 18,329          |
| 105DPP     | 71,372,371  | 52,916,490   | 12,403,501          | 16,349          |
| 120DPP     | 83,506,278  | 62,428,925   | 14,407,421          | 15,709          |
| 135DPP     | 98,713,383  | 70,080,905   | 10,247,674          | 15,978          |
| Green leaf | 94,042,176  | 45,735,383   | 14,697,605          | 16,022          |

**Supplementary Table S10. Gene ontology (GO) enrichment analysis of up-regulated genes in date palm fruits**

| <b>GO ID</b> | <b>GO Term</b>                          | <b>P-value</b> | <b>FDR*</b> |
|--------------|-----------------------------------------|----------------|-------------|
| GO:0006094   | gluconeogenesis                         | 2.6E-18        | 1.2E-16     |
| GO:0044262   | cellular carbohydrate metabolic process | 1.7E-04        | 7.9E-03     |
| GO:0044283   | small molecule biosynthetic process     | 1.0E-03        | 4.8E-02     |

\*FDR: False discovery rate

**Supplementary Table S11. Gene ontology (GO) enrichment analysis of down-regulated genes in date palm fruits**

| <b>GO ID</b> | <b>GO Term</b>                                           | <b>P-value</b> | <b>FDR</b> |
|--------------|----------------------------------------------------------|----------------|------------|
| GO:0060255   | regulation of macromolecule metabolic process            | 1.9E-14        | 1.6E-12    |
| GO:0050789   | regulation of biological process                         | 1.6E-10        | 1.4E-08    |
| GO:0006350   | transcription                                            | 1.8E-10        | 1.6E-08    |
| GO:0065007   | biological regulation                                    | 1.9E-10        | 1.7E-08    |
| GO:0006108   | malate metabolic process                                 | 2.0E-08        | 1.8E-06    |
| GO:0007018   | microtubule-based movement                               | 1.3E-07        | 1.2E-05    |
| GO:0043648   | dicarboxylic acid metabolic process                      | 2.4E-06        | 2.1E-04    |
| GO:0051252   | regulation of RNA metabolic process                      | 1.4E-05        | 1.2E-03    |
| GO:0016614   | oxidoreductase activity, acting on CH-OH group of donors | 2.4E-08        | 1.3E-06    |
| GO:0016798   | hydrolase activity, acting on glycosyl bonds             | 4.3E-04        | 2.3E-02    |
| GO:0005576   | extracellular region                                     | 2.2E-07        | 1.1E-06    |

**Supplementary Table S12. SNP density (per kb) among varieties (both intervariety and introvariety in a 10-kb window and 1-kb step).**

| Varieties           | Origin       | Collection site | Coverage | SNP density (SNP/kb) |             |             |            |             |             |             |             |             |             |                 |
|---------------------|--------------|-----------------|----------|----------------------|-------------|-------------|------------|-------------|-------------|-------------|-------------|-------------|-------------|-----------------|
|                     |              |                 |          | Khalas               | Sukry       | Fahal       | Agwa       | Khalt       | AlrijalF    | KhalsFx     | Medjool     | Medjool BC4 | Deglet Noor | Deglet Noor BC5 |
| Khalas              | KSA          | Al-Hssa, KSA    | 122      | <b>2.57</b>          | 3.01        | 2.89        | 3.05       | 2.09        | 2.46        | 1.7         | 2.8         | 2.55        | 3.03        | 2.55            |
| Sukry               | KSA          | Al-Qasim, KSA   | 61       |                      | <b>6.24</b> | 3.11        | 3.65       | 3.59        | 3.66        | 3.37        | 4.29        | 4.11        | 4.37        | 4.06            |
| Fahal (M)           | KSA          | Al-Hssa, KSA    | 91       |                      |             | <b>5.51</b> | 3.59       | 3.49        | 3.46        | 3.26        | 4.2         | 4.02        | 4.28        | 3.96            |
| Agwa                | KSA          | Al-Medina, KSA  | 88       |                      |             |             | <b>6.1</b> | 3.64        | 3.77        | 3.42        | 4.31        | 4.14        | 4.41        | 4.08            |
| Khalt (M) *         | Qatar        | Qatar           | 12       |                      |             |             |            | <b>4.25</b> | 2.71        | 2.23        | 3.12        | 2.89        | 3.24        | 2.87            |
| AlrijalF*           | Qatar        | Qatar           | 15       |                      |             |             |            |             | <b>6.63</b> | 2.58        | 3.44        | 3.22        | 3.48        | 3.17            |
| KhalsFx *           | KSA/USA      | California, USA | 39       |                      |             |             |            |             |             | <b>3.85</b> | 2.88        | 2.66        | 3.13        | 2.71            |
| Medjool *           | North Africa | California, USA | 28       |                      |             |             |            |             |             |             | <b>5.45</b> | 2.71        | 3.56        | 3.31            |
| Medjool BC4(M)*     | California   | California, USA | 27       |                      |             |             |            |             |             |             |             | <b>4.44</b> | 3.4         | 3.08            |
| Deglet Noor *       | North Africa | California, USA | 24       |                      |             |             |            |             |             |             |             |             | <b>6.55</b> | 2.7             |
| Deglet Noor BC5(M)* | California   | California, USA | 24       |                      |             |             |            |             |             |             |             |             |             | <b>5.07</b>     |

\*These raw data were downloaded from the SRA of GenBank. M indicates male variety. Only major alleles were considered as intervariety SNPs.

**Supplementary Table S13. Indel density of four varieties**

| <b>Varieties</b> | <b>Indels</b> | <b>Indel density<br/>(indels/kb)</b> |
|------------------|---------------|--------------------------------------|
| Khalas           | 56,463        | 0.100257                             |
| Agwa             | 138,270       | 0.245515                             |
| Fahal (M)        | 86,495        | 0.153582                             |
| Sukry            | 113,057       | 0.200746                             |

**Supplementary Table S14. SNP desert size with different sliding windows.**

| <b>The minimum<br/>SNP desert size</b> | <b>Total SNP desert<br/>length</b> | <b>Percent of Khalas<br/>genome</b> | <b>N50 size</b> |
|----------------------------------------|------------------------------------|-------------------------------------|-----------------|
| 1 kb                                   | 131,465,000 bp                     | 21.7%                               | 32,000 bp       |
| 5 kb                                   | 121,052,000 bp                     | 20.0%                               | 37,000 bp       |
| 10 kb                                  | 108,259,000 bp                     | 17.9%                               | 43,000 bp       |
| 20 kb                                  | 86,267,000 bp                      | 14.3%                               | 56,000 bp       |

**Supplementary Table S15. GO cluster for genes in *P. dactylifera* unique families.**

| GO id                                                                                                                                 | Gene no. | GO items                             | P value |
|---------------------------------------------------------------------------------------------------------------------------------------|----------|--------------------------------------|---------|
| 0004540; 0004518; 0016891; 0004523; 0004519; 0016893; 0004521; 0016788; 0016787; 0008784                                              | 435      | MF: Catalytic activity               | 0       |
| 0006139; 0006278; 0044238; 0015074; 0044267; 0019538; 0006259; 0044260; 0043283; 0006260; 0006333; 0006325; 0006323; 0051276; 0006996 | 2782     | BP: DNA/RNA Metabolic process        | 0       |
| 0043170                                                                                                                               | 2701     | BP: Macromolecule metabolic process; | 0       |
| 0046872; 0043167; 0008270; 0046914                                                                                                    | 1429     | MF: Ion binding                      | 0       |
| 0044464; 0005623                                                                                                                      | 2003     | CC: Cell part                        | 0       |

**Supplementary Table S16. Reference summary of *P. dactylifera* genome size estimation**

| Prime Estimate | Genus          | Species            | Chr No. | Ploidy | Estimation method | 1C (Mb) | Original Reference                        |
|----------------|----------------|--------------------|---------|--------|-------------------|---------|-------------------------------------------|
|                | <i>Phoenix</i> | <i>dactylifera</i> | 36      | 2      | FC:PI             | 680     | Al-Dous et al., 2011 <sup>6</sup>         |
| Prime          | <i>Phoenix</i> | <i>canariensis</i> | 36      | 2      | FC:PI             | 880     | Suda et al., 2005 <sup>72</sup>           |
| Prime          | <i>Phoenix</i> | <i>dactylifera</i> | 36      | 2      | Fe                | 929     | Olszewska and Osiecka, 1982 <sup>73</sup> |
|                | <i>Phoenix</i> | <i>dactylifera</i> | 36      | 2      | FC:PI             | 1,296   | Zonneveld et al., 2005 <sup>74</sup>      |
| Prime          | <i>Phoenix</i> | <i>theophrasti</i> | 36      | 2      | Fe                | 1,296   | Röser et al., 1997 <sup>75</sup>          |
| Prime          | <i>Phoenix</i> | <i>rupicola</i>    | 36      | 2      | Fe                | 1,467   | Röser et al., 1997                        |
| Prime          | <i>Phoenix</i> | <i>roebelenii</i>  | 36      | 2      | Fe                | 1,491   | Röser et al., 1997                        |

**Supplementary Table S17. Clustered top30 GO enrichment results (p<0.0001) for the genes in multi-syteny regions.** BP: biological\_process; MF: molecular\_function; CC: cellular\_component.

| GO id                                                                                                                                            | Gene no. | GO items                                                                                                                                                                                        | P value  |
|--------------------------------------------------------------------------------------------------------------------------------------------------|----------|-------------------------------------------------------------------------------------------------------------------------------------------------------------------------------------------------|----------|
| 0065007;<br>0050794;0050789;<br>0045449;<br>0019219;0010468;<br>0031323;<br>0019222;0006350;<br>0006355;<br>0050790;0006351;<br>0065009; 0032774 | 153      | BP: Regulation of cellular process/Transcription/ Nucleobase, nucleoside, nucleotide and nucleic acid metabolic process/ Gene expression/ Transcription, DNA-dependent/RNA biosynthetic process | 1.37e-33 |
| 0006259; 0003677                                                                                                                                 | 84       | BP: DNA metabolic process<br>MF: DNA binding;                                                                                                                                                   | 5.53e-30 |
| 0010467                                                                                                                                          | 159      | BP: Gene expression                                                                                                                                                                             | 2.27e-23 |
| 0015074; 0043234;<br>0032991                                                                                                                     | 26       | BP: Protein complex; DNA integration<br>CC: Macromolecular complex                                                                                                                              | 7.48e-18 |
| 0006260; 0042578                                                                                                                                 | 19       | BP: DNA replication<br>MF: Phosphoric ester hydrolase activity                                                                                                                                  | 4.84e-14 |

**Supplementary Table S18. Numbers of NBS genes found in *P. dactylifera* and other plant genomes.** Pd: *Phoenix dactylifera*; Zm: *Zea mays*; Sb: *Sorghum bicolor*; Os: *Oryza sativa*; Tc: *Theobroma cacao*; Pt: *Populus trichocarpa*; Vv: *Vitis vinifera*; Mt: *Medicago truncatula*; At: *Arabidopsis thaliana*.

| Gene family         | Pd  | Zm  | Sb  | Os  | Tc  | Pt  | Vv  | Mt  | At  |
|---------------------|-----|-----|-----|-----|-----|-----|-----|-----|-----|
| TIR-NBS-LRR         | NA  | NA  | NA  | NA  | 8   | 78  | 97  | 118 | 93  |
| CC-NBS-LRR          | 19  | 72  | 132 | 276 | 82  | 120 | 203 | 152 | 51  |
| NBS-LRR             | 16  | 23  | 52  | 182 | 104 | 132 | 159 | NA  | 3   |
| NBS                 | 69  | 10  | 34  | 27  | 53  | 62  | 36  | 328 | 1   |
| CC-NBS              | 40  | 24  | 27  | 23  | 46  | 14  | 26  | 25  | 5   |
| TIR-NBS             | NA  | NA  | NA  | NA  | 4   | 10  | 14  | 38  | 21  |
| Total NBS-LRR genes | 35  | 95  | 184 | 458 | 194 | 330 | 459 | NA  | 147 |
| Total NBS genes     | 144 | 129 | 245 | 508 | 297 | 416 | 535 | 661 | 174 |

**Supplementary Table S19. Energy and sugar metabolism related genes in plant genomes.** We identified metabolism pathways based on *P. dactylifera* (Pd) gene models as well as information from other representative species, including *O. sativa* (Os), *S. bicolor* (Sb), *A. thaliana* (At), *P. trichocarpa* (Pt), and *V. vinifera* (Vv), using the KAAS online search service (<http://www.genome.ad.jp/tools/kaas/>). The orthologs related to energy and sugar metabolisms were extracted

| Energy and sugar related pathways           | Gene number |     |     |     |     |     |
|---------------------------------------------|-------------|-----|-----|-----|-----|-----|
|                                             | Pd          | Os  | Sb  | At  | Pt  | Vv  |
| Amino sugar and nucleotide sugar metabolism | 31          | 34  | 32  | 29  | 43  | 33  |
| Carbon fixation in photosynthetic organisms | 43          | 45  | 41  | 43  | 51  | 31  |
| Fructose and mannose metabolism             | 17          | 19  | 16  | 16  | 19  | 13  |
| Galactose metabolism                        | 18          | 16  | 18  | 19  | 24  | 15  |
| Glycolysis/Gluconeogenesis                  | 90          | 97  | 96  | 89  | 110 | 76  |
| Pentose and glucuronate interconversions    | 17          | 16  | 13  | 35  | 36  | 22  |
| Photosynthesis                              | 50          | 55  | 41  | 51  | 56  | 32  |
| Photosynthesis - antenna proteins           | 19          | 15  | 16  | 20  | 22  | 11  |
| Starch and sucrose metabolism               | 105         | 111 | 100 | 112 | 145 | 102 |

## Supplementary Notes

### Supplementary Note 1. Genome size estimation

Although there are several studies that estimate the genome size of *P. dactylifera* as ranging from 680 Mb to 1,491 Mb, all are based on results from flow cytometry (Supplementary Table S16), and the physical size of the *P. dactylifera* genome remains elusive. We estimated the genome size in three different ways. First, based on all of the Roche/454 GS FLX reads, we calculated the frequency of every 20-mer sequence for all reads in a hash table and estimated the coverage based on the frequencies of median repeat values (Supplementary Fig. S10). The estimated genome size based on this procedure was ~638.2 Mb. Second, we estimated the genome size based on the coverage distribution of the Newbler contigs (Supplementary Fig. S11). We classified the contigs into heterozygous, unique, and multiple, based on coverage. The heterozygous contigs, whose collective size is half of the heterozygous contigs, are 104,212,972 bp. The unique regions cover 438,982,154 bp. The length of the regions covered by multiple contigs was calculated based on the total read lengths mapped in the contigs and the average coverage of the unique regions. We estimated that the average collapsed ratio in these regions is approximately 1:5.56 (approximately 20.18 Mb in our assembly). The actual length of the multi-covered regions is 171,206,668 bp (“the pyrosequencing reads in the multi-covered regions + the unassembled repeat reads” / the average\_unique\_coverage). The genome size was thus calculated as follows:  $104,212,972 \times 0.5 + 438,982,154 + 171,206,668 = \sim 662.3$  Mb. Third, we estimated the repetitive sequence content. The total repeat content was estimated to be 38.41% by the genome average, but we only have 21.31% repeats in the 558.02 Mb genome assembly. If the missing part of the repeat content is factored in, we obtain a genome size of ~713.0 Mb. Taking all estimates into consideration, we believe that the *P. dactylifera* genome is ~671.2 Mb, which is close to the estimate reported by Al-Dous et al<sup>6</sup>.

### Supplementary Note 2. Gene prediction and annotation

We predicted 50,132 *ab initio* gene models using Fgenesh++<sup>12</sup> with monocot parameters (contig size > 500 bp). A total of 40,588 of the gene models contain polyA signals, and 42,080 of the gene models have both start and stop codons. We used all plant protein sequences from the NCBI Refseq databases (release 44)<sup>76</sup> and Swiss-Prot (2010\_11)<sup>77,78</sup> for splicing variant alignments, using Spaln<sup>79,80</sup> with default parameters. We also constructed a series of EST libraries (sequences generated from both the SOLiD and pyrosequencing platforms) from different tissues (male and female flowers, flower buds, green and yellow leaves, roots, and fruits) and assembled them into 67,651 transcription units with an N50 size of 1,911 bp<sup>11</sup>. PASA<sup>81</sup> was used for EST alignments. Transcripts were assembled with a maximal intron length of

3,000 bp, yielding 66,738 (98%) transcription units with their spliced variants aligned to the genome assembly. We selected 671 intact and highly credible transcripts for EVM<sup>82</sup> training by manual inspection (using Blastp with the rice and Arabidopsis records in UniProt with  $E < 1e-5$  and 90% identity for confirmation). EVM combined all predictions, and the output was patched with two runs of PASA for the small exon and potential UTR regions.

The output models with premature termination were discarded, although some of them have supported expression tag reads. Overlapping models with repeat annotations at exon regions were selected and show a different pattern in the length and percent of the overlap (Supplementary Figure S12). Gene models with smaller degrees of overlap to repeat annotations were preferred to numbers of gene families, and the parts that were fully contained in the repeat regions were annotated as TE proteins or ORFs in TE regions with a smaller length distribution. We used a 50% exon overlap as a cutoff to distinguish the models with TE proteins. Some gene models with a 50% repeat overlap were also discarded if there were no homologous proteins in NCBI or functional domains. The remaining repeat related proteins were approximately 6,843 and more than 78% (5356) of the models had functional domains related to transposition. We used these protein sequences to with all known date palm proteins, and combined the outputs of TransposonPSI to blast against all UniProtKB/Swiss-Prot proteins to retrieve the functional genes. There were also some unique date palm non-TE protein sequences that could not be identified. We estimate that the total number of TE proteins in our annotation is no more than 10,428 (Supplementary Fig. S13). Finally, we identified 41,660 gene models (42,957 isoforms) in 10,363 scaffolds of the date palm genome. Approximately 84% of these gene models (35,106) have cDNA support (31,493, > 80% coverage) or SOLiD RNA-seq reads support (24,501, > 5 unique-mapped reads in at least one tissue). The predicted gene models were investigated (Supplementary Fig. S3); however, we did not observe any gene models in contigs shorter than 500 bp. We thus excluded sequences smaller than 500 bp from further analysis.

In the annotation effort, we transferred GO function IDs using InterProScan v4.7<sup>83</sup> (50% exon overlap, Blastp  $E < 1e-10$ , identity > 50%, and coverage > 50%) and enzyme EC IDs using the KEGG annotation system<sup>43</sup> (default parameters), and finally annotated 31,943 gene models. We also identified orthologous genes in *P. dactylifera*, *A. thaliana*, *O. sativa*, *S. bicolor*, and *V. vinifera* using amino acid sequences from Phytozome v7.0 and only kept the longest sequences. All-to-all Blastp was performed with  $E < 1e-5$ . OrthoMCL 2.0.2<sup>84</sup> was used to construct the orthologous groups using the best reciprocal hit approach. We selected the genes with single copies in each orthology group. The amino acid sequences of genes were concatenated to obtain the NJ (neighbor-joining) tree using the MEGA5 program. *P. dactylifera* is a prior speciation to the grass family after the divergence between monocots and dicots (Supplementary Fig. S14).

We also predicted RNA genes including 414 tRNA (38 tRNA pseudogenes), 219 5S rRNA, 458 4S rRNA, 44 box H/ACA snoRNA, and 18 box C/D snoRNA genes (Supplementary Data 3).

### **Supplementary Note 3. Genome-wide duplication**

We used MCscan<sup>85</sup> to define syntenic regions between *P. dactylifera* and other plants. One isoform for each gene was selected for this exercise. The best five mutual hits of the Blastp results were used as MCscan inputs. Only the syntenic segments that had more than five gene pairs were considered for 4DTv calculation. Raw 4DTv values were corrected for possible multiple transversions at the same site. Ks values were calculated using the KaKs\_Calculator<sup>86</sup> with the NG (Nei-Gojobori) model. The Kernel density estimation of 4DTv distance, or Ks, was performed using a Perl module (Supplementary Fig. S4). There are 15,202 (36% of the total) genes located in the syntenic blocks. Considering the scattered assembling, it is quite a large fraction of the *P. dactylifera* genome. If we plot all the contigs/scaffolds that contain collinear blocks, we see that almost all of the collinear blocks are in one-vs.-one matches (Supplementary Fig. S15). We also assessed co-linearities with other monocot plants, and a few examples are shown in Supplementary Fig. S5.

The regions with multi-syntenic regions were also selected to trace the second peak in the Ks plot (Supplementary Fig. S16). The 745 gene pairs in these regions as well as GO cluster results are consistent with previous results. Most retained genes after GWD (genome-wide duplication) or segmental duplications, have the function of transcription regulation (Supplementary Table S17).

### **Supplementary Note 4. Identification of NBS family in the *P. dactylifera* genome**

The genes that encode NBS (nucleotide-binding site) proteins play a key role in plant pathogen sensing, host defence, and cell cycle progression<sup>87</sup>. The NBS-LRR gene family is rather abundant in plant genomes, ranging from 0.6% to approximately 2% of the total genes<sup>87-89</sup>. The resistance protein (R protein) gene family can be subdivided into different groups based on the structure of N-terminal and C-terminal domains. The N-terminal domain either has a CC (coiled-coil) /TIR (Toll-interleukin receptor) motif or not. While the C-terminal domain can either contain a LRR (leucine-rich repeat) motif or not<sup>90</sup>.

The *P. dactylifera* protein sequences were screened using Hidden Markov Models (HMMs) with Pfam NBS (NB-ARC) family PF00931 domains (E-value cutoff of 1.0)<sup>91</sup> using hmmsearch v3 software<sup>92</sup>. Sequences of non-conserved domains were manually removed, and 144 sequences were retained. The 144 predicted NBS-encoding amino acid sequences were used to detect TIR domains using an HMM model with Pfam TIR PF01582 (E-value cutoff 1.0) domains and LRR motifs

in the C-terminal domains. The HMM models Pfam LRR\_1 (PF00560), LRR\_2 (PF07723) and LRR\_3 (PF07725) (E-value cutoff 1.0)<sup>91</sup> were employed to screen the predicted NBS-encoding amino acid sequences. CC (coiled-coil) motifs were screened using Paircoil2<sup>93</sup> (P-score cutoff of 0.025). Totally, 144 non-redundant NBS-encoding genes were identified and manually validated, which account for approximately 0.35% of the gene models in the *P. dactylifera* genome. In other monocot plants such as *Z. mays*, *S. bicolor*, and *O. sativa*, the percentage is 0.4%, 0.68% and 1.35%, respectively<sup>94</sup>. In some eudicot plants, for instance, *T. cacao*, *P. trichocarpa*, *V. vinifera*, *M. truncatula*, and *A. thaliana*, the percentage of NBS-encoding genes is 0.9%, 1%, 1.8%, 1.2% and 0.7%, respectively (Supplementary Table S18)<sup>88,89,95</sup>. The TIR-NBS-LRR and TIR-NBS orthologous genes are absent in the *P. dactylifera* genome as well as in the other three monocot plants, and the CC-NBS-LRR gene is comparatively less frequent in the *P. dactylifera* genome than in other monocot plants.

### **Supplementary Note 5. Mining genes related to energy and sugar metabolism in representative plant genomes**

We identified metabolic pathways based on well-defined gene models of *P. dactylifera* and information from other representative species, including *O. sativa*, *S. bicolor*, *A. thaliana*, *P. trichocarpa*, and *V. vinifera*, using the KAAS online search service (<http://www.genome.ad.jp/tools/kaas/>). The orthologs related to energy and sugar metabolism were extracted (Supplementary Table S19). We identified 148 orthologs representing 390 genes in the *P. dactylifera* genome assembly. The duplication and expansion of carbon and sugar metabolism-related genes appears to be correlated with unique sugar metabolism pathways. For instance, ribose-5-phosphate isomerase A has five copies in *P. dactylifera*, but only two and three orthologs are found in *O. sativa* and *S. bicolor*, respectively. We also found 14 pyruvate kinase genes in *P. dactylifera*, but detected only 8 in rice and 10 in *S. bicolor*. Another example is *P. dactylifera* pyruvate orthophosphate dikinase, which has two tandem copies that are 92.4% identical in amino acid sequence, corresponding to a single copy in maize and sorghum. Similarly, two pairs of adjacent phosphoglycerate kinase genes recruited new paralogs via fragmental duplication.

## Supplementary References

- 52 Price, A. L., Jones, N. C. & Pevzner, P. A. De novo identification of repeat families in large genomes. *Bioinformatics* **21 Suppl 1**, i351-358 (2005).
- 53 Xu, Z. & Wang, H. LTR\_FINDER: an efficient tool for the prediction of full-length LTR retrotransposons. *Nucleic Acids Res.* **35**, W265-268 (2007).
- 54 Han, Y. & Wessler, S. R. MITE-Hunter: a program for discovering miniature inverted-repeat transposable elements from genomic sequences. *Nucleic Acids Res.* **38**, e199 (2010).
- 55 Banks, J. A. *et al.* The *Selaginella* genome identifies genetic changes associated with the evolution of vascular plants. *Science* **332**, 960-963 (2011).
- 56 Paterson, A. H. *et al.* The *Sorghum bicolor* genome and the diversification of grasses. *Nature* **457**, 551-556 (2009).
- 57 Vielle-Calzada, J. P. *et al.* The *Palomero* genome suggests metal effects on domestication. *Science* **326**, 1078 (2009).
- 58 The International Brachypodium Initiative. Genome sequencing and analysis of the model grass *Brachypodium distachyon*. *Nature* **463**, 763-768 (2010).
- 59 The Arabidopsis Genome Initiative. Analysis of the genome sequence of the flowering plant *Arabidopsis thaliana*. *Nature* **408**, 796-815 (2000).
- 60 Velasco, R. *et al.* The genome of the domesticated apple (*Malus x domestica* Borkh.). *Nat. Genet.* **42**, 833-839 (2010).
- 61 Tuskan, G. A. *et al.* The genome of black cottonwood, *Populus trichocarpa* (Torr. & Gray). *Science* **313**, 1596-1604 (2006).
- 62 Velasco, R. *et al.* A high quality draft consensus sequence of the genome of a heterozygous grapevine variety. *PLoS ONE* **2**, e1326 (2007).
- 63 Kim, M. Y. *et al.* Whole-genome sequencing and intensive analysis of the undomesticated soybean (*Glycine soja* Sieb. and Zucc.) genome. *Proc. Natl. Acad. Sci. U.S.A.* **107**, 22032-22037 (2010).
- 64 Chan, A. P. *et al.* Draft genome sequence of the oilseed species *Ricinus communis*. *Nat. Biotechnol.* **28**, 951-956 (2010).
- 65 Varshney, R. K. *et al.* Draft genome sequence of pigeonpea (*Cajanus cajan*), an orphan legume crop of resource-poor farmers. *Nat. Biotechnol.* **6**, 83-89 (2011).
- 66 Sato, S. *et al.* Genome structure of the legume, *Lotus japonicus*. *DNA Res.* **15**, 227-239 (2008).
- 67 Ming, R. *et al.* The draft genome of the transgenic tropical fruit tree papaya (*Carica papaya* Linnaeus). *Nature* **452**, 991-996 (2008).
- 68 Shulaev, V. *et al.* The genome of woodland strawberry (*Fragaria vesca*). *Nat. Genet.* **43**, 109-116 (2011).
- 69 Wang, X. *et al.* The genome of the mesopolyploid crop species *Brassica rapa*. *Nat. Genet.* **28**, 1035-1039 (2011).
- 70 Jurka, J. *et al.* Repbase update, a database of eukaryotic repetitive elements. *Cytogenet. Genome Res.* **110**, 462-467 (2005).
- 71 Argout, X. *et al.* The genome of *Theobroma cacao*. *Nat. Genet.* **43**, 101-108 (2011).
- 72 Suda, J., Kyncl, T. & Jarolimova, V. Genome size variation in Macaronesian angiosperms: forty percent of the Canarian endemic flora completed. *Plant Sys. Evol.* **252**, 215 (2005).
- 73 Olszewska, M. J. & Osiecka, R. Relationship between 2C DNA content, life-cycle, systematic

position & level of DNA endoreplication in parenchyma cell nuclei during root growth and differentiation in some monocots. *Biochem. Physiol. Pflanz.* **177**, 319-336 (1982).

74 Zonneveld, B. J., Leitch, I. J. & Bennett, M. D. First nuclear DNA amounts in more than 300 angiosperms. *Ann. Bot.* **96**, 229-244 (2005).

75 Röser, M., Johnson, M. & Hanson, L. Nuclear DNA amounts in palms (*Arecaceae*). *Bot. Acta.* **110**, 79-89 (1997).

76 Pruitt, K. D., Tatusova, T. & Maglott, D. R. NCBI reference sequences (RefSeq): a curated non-redundant sequence database of genomes, transcripts and proteins. *Nucleic Acids Res.* **35**, D61-65 (2007).

77 UniProt Consortium. The universal protein resource (UniProt) in 2010. *Nucleic Acids Res.* **38**, D142-148 (2010).

78 Jain, E. *et al.* Infrastructure for the life sciences: design and implementation of the UniProt website. *BMC Bioinformatics* **10**, 136 (2009).

79 Gotoh, O. A space-efficient and accurate method for mapping and aligning cDNA sequences onto genomic sequence. *Nucleic Acids Res.* **36**, 2630-2638 (2008).

80 Gotoh, O. Direct mapping and alignment of protein sequences onto genomic sequence. *Bioinformatics* **24**, 2438-2444 (2008).

81 Haas, B. J. *et al.* Improving the *Arabidopsis* genome annotation using maximal transcript alignment assemblies. *Nucleic Acids Res.* **31**, 5654-5666 (2003).

82 Haas, B. J. *et al.* Automated eukaryotic gene structure annotation using EVIDENCEModeler and the program to assemble spliced alignments. *Genome Biol.* **9**, R7 (2008).

83 Zdobnov, E. M. & Apweiler, R. InterProScan--an integration platform for the signature-recognition methods in InterPro. *Bioinformatics* **17**, 847-848 (2001).

84 Qin, E. *et al.* A genome sequence of novel SARS-CoV isolates: the genotype, GD-Ins29, leads to a hypothesis of viral transmission in South China. *Genomics Proteomics Bioinformatics* **1**, 101-107 (2003).

85 Tang, H. *et al.* Unraveling ancient hexaploidy through multiply-aligned angiosperm gene maps. *Genome Res.* **18**, 1944-1954 (2008).

86 Zhang, Z. *et al.* KaKs\_Calculator: calculating Ka and Ks through model selection and model averaging. *Genomics Proteomics Bioinformatics* **4**, 259-263 (2006).

87 DeYoung, B. J. & Innes, R. W. Plant NBS-LRR proteins in pathogen sensing and host defense. *Nat. Immunol.* **7**, 1243-1249 (2006).

88 Mun, J. H., Yu, H. J., Park, S. & Park, B. S. Genome-wide identification of NBS-encoding resistance genes in *Brassica rapa*. *Mol. Genet. Genomics* **282**, 617-631 (2009).

89 Ameline-Torregrosa, C. *et al.* Identification and characterization of nucleotide-binding site-leucine-rich repeat genes in the model plant *Medicago truncatula*. *Plant Physiol.* **146**, 5-21 (2008).

90 McHale, L., Tan, X. P., Koehl, P. & Michelson, R. W. Plant NBS-LRR proteins: adaptable guards. *Genome Biol.* **7**, 212 (2006).

91 Finn, R. D. *et al.* The Pfam protein families database. *Nucleic Acids Res.* **38**, D211-D222 (2010).

92 Eddy, S. R. A new generation of homology search tools based on probabilistic inference. *Genome Inform.* **23**, 205-211 (2009).

93 McDonnell, A. V., Jiang, T., Keating, A. E. & Berger, B. Paircoil2: improved prediction of coiled coils from sequence. *Bioinformatics* **22**, 356-358 (2006).

- 94 Li, J. *et al.* Unique evolutionary pattern of numbers of gramineous NBS–LRR genes. *Mol. Genet. Genomics* **283**, 427–438 (2010).
- 95 Porter, B. W. *et al.* Genome-wide analysis of *Carica papaya* reveals a small NBS resistance gene family. *Mol. Genet. Genomics* **281**, 609–626 (2009).
